# Supplementary material for: Upscaling Strategies of Porosity-Permeability Correlations in Reacting Environments from Pore-Scale Simulations
Source: Hindawi journal article supplement (doi:10.1155/2018/9260603), 2018-06-19
Supplement: f1 [file 9260603.f1.zip]

Archive with 2 entries (2 files):
- Video_S1.avi
- Video_S2.avi
